# Supplementary material for: 4-Hydroxy-1α,25-Dihydroxyvitamin D3: Synthesis and Structure–Function Study
Source: MDPI journal article supplement (doi:10.3390/biom14050551), 2024-05-03
Supplement: s1 [file biomolecules-2979293-supplementary.pdf › biomolecules-2979293-supplementary.pdf]

|                                           | zVDR LBD – 1,4 $\alpha$ ,25D <sub>3</sub> | zVDR LBD – 1,4 $\beta$ ,25D <sub>3</sub> |
|-------------------------------------------|-------------------------------------------|------------------------------------------|
| <b>PDB ID</b>                             | 9EZ1                                      | 9EZ2                                     |
| <b>Data collection</b>                    |                                           |                                          |
| Beamline                                  | PX2                                       | PX2                                      |
| Space group                               | P6 <sub>5</sub> 22                        | P6 <sub>5</sub> 22                       |
| Unit-cell parameters (Å, °)               | 65.98, 65.98, 263.47<br>90, 90, 120       | 66.14, 66.14, 263.74<br>90, 90, 120      |
| Resolution range (Å)                      | 43.16-1.95                                | 43.96-1.8                                |
| Unique reflections                        | 25896                                     | 32871                                    |
| I/ $\sigma$ (I)                           | 22.96                                     | 23.45                                    |
| CC <sub>1/2</sub>                         | 1                                         | 1                                        |
| Completeness                              | 99.30                                     | 99.30                                    |
| <b>Refinement</b>                         |                                           |                                          |
| Resolution range (Å)                      | 43.16-1.95                                | 43.96-1.8                                |
| R <sub>work</sub> / R <sub>free</sub> (%) | 20.58 / 25.52                             | 20.16 / 22.98                            |
| Ramachandran                              |                                           |                                          |
| Allowed (%)                               | 1.23                                      | 0.82                                     |
| Favored (%)                               | 98.77                                     | 99.18                                    |
| Mean B factors (Å <sup>2</sup> )          |                                           |                                          |
| Protein                                   | 61.31                                     | 58.52                                    |
| Ligand                                    | 42.56                                     | 39.18                                    |

**Supplementary Table S1. Crystallographic data and refinement.**
